# Supplementary material for: Exploring the measurement properties of the osteopathy clinical teaching questionnaire using Rasch analysis
Source: PubMed Central journal article supplement (PMC5932865; doi:10.1186/s12998-018-0182-2), 2018-05-03
Supplement: 12998_2018_182_MOESM1_ESM.pdf [file 12998_2018_182_MOESM1_ESM.pdf]

## Osteopathy Clinical Teaching Questionnaire

Using the following scale, please rate your Clinical Educator on the statements below:

- 5 – Strongly agree
- 4 – Agree
- 3 – Neither agree nor disagree
- 2 – Disagree
- 1 – Strongly disagree

Please indicate the gender of the Clinical Educator who is being rated:  
 Male  Female

Please indicate your gender:  
 Male  Female

| This Clinical Educator...                                                                                      | Rating |   |   |   |   |
|----------------------------------------------------------------------------------------------------------------|--------|---|---|---|---|
| Treated me with respect                                                                                        | 5      | 4 | 3 | 2 | 1 |
| Maintained a positive attitude towards me                                                                      | 5      | 4 | 3 | 2 | 1 |
| Fostered an environment of respect in which I felt comfortable participating                                   | 5      | 4 | 3 | 2 | 1 |
| Established a good learning environment (approachable, focused, nonthreatening, professional and enthusiastic) | 5      | 4 | 3 | 2 | 1 |
| Demonstrated humanistic attitudes in relating to patients (integrity, compassion and respect)                  | 5      | 4 | 3 | 2 | 1 |
| Was approachable for discussion                                                                                | 5      | 4 | 3 | 2 | 1 |
| Showed genuine concern for my professional well-being                                                          | 5      | 4 | 3 | 2 | 1 |
| Had reasonable expectations of students                                                                        | 5      | 4 | 3 | 2 | 1 |
| Has good communication skills                                                                                  | 5      | 4 | 3 | 2 | 1 |
| Is open to student questions and alternative approaches to patient management                                  | 5      | 4 | 3 | 2 | 1 |
| Gave me the opportunity to offer opinions on patient problems or treatment                                     | 5      | 4 | 3 | 2 | 1 |
| Adjusted teaching to my needs (experience, competence, interest)                                               | 5      | 4 | 3 | 2 | 1 |
| Is an effective clinical teacher                                                                               | 5      | 4 | 3 | 2 | 1 |
| Encouraged me to think                                                                                         | 5      | 4 | 3 | 2 | 1 |
| Promoted reflection on clinical practice                                                                       | 5      | 4 | 3 | 2 | 1 |
| Emphasises a problem-solving approach rather than solutions                                                    | 5      | 4 | 3 | 2 | 1 |
| Asked questions that promote learning (clarifies, probes, reflective questions etc.)                           | 5      | 4 | 3 | 2 | 1 |
| Asked questions to enhance my learning                                                                         | 5      | 4 | 3 | 2 | 1 |
| Encouraged questions and active participation                                                                  | 5      | 4 | 3 | 2 | 1 |
| Stimulates me to learn independently                                                                           | 5      | 4 | 3 | 2 | 1 |
| Gave timely feedback to me                                                                                     | 5      | 4 | 3 | 2 | 1 |
| Gave me regular, useful feedback about my knowledge and performance                                            | 5      | 4 | 3 | 2 | 1 |
| Offered me suggestions for improvement when required                                                           | 5      | 4 | 3 | 2 | 1 |

*Please turn over the page*

**Osteopathy Clinical Teaching Questionnaire**

| This Clinical Educator...                                                                       | Rating |   |   |   |   |
|-------------------------------------------------------------------------------------------------|--------|---|---|---|---|
| Identified areas needing improvement                                                            | 5      | 4 | 3 | 2 | 1 |
| Identified my strengths                                                                         | 5      | 4 | 3 | 2 | 1 |
| Explained to me why I was correct or incorrect                                                  | 5      | 4 | 3 | 2 | 1 |
| Promoted keeping of medical records in a way that is thorough, legible, efficient and organised | 5      | 4 | 3 | 2 | 1 |
| Encouraged me to assume responsibility for patient care                                         | 5      | 4 | 3 | 2 | 1 |
| Demonstrates knowledge of current medical and manual therapy literature                         | 5      | 4 | 3 | 2 | 1 |
| Demonstrated osteopathic, clinical examination and rehabilitation knowledge and skill(s)        | 5      | 4 | 3 | 2 | 1 |

**Please rate your Clinical Educator on the following statements:**

|                                                                      |   |   |   |   |   |
|----------------------------------------------------------------------|---|---|---|---|---|
| I would do more clinics with this Clinical Educator                  | 5 | 4 | 3 | 2 | 1 |
| I would recommend other students to work with this Clinical Educator | 5 | 4 | 3 | 2 | 1 |

**Rate the overall effectiveness of this Clinical Educator as an educator/supervisor:**

- Poor
  Fair
  Good
  Very good
  Excellent

**What have you enjoyed about working with this Clinical Educator?**

---



---



---



---



---



---

**Are there any areas where this Clinical Educator could improve or develop?**

---



---



---



---



---



---
