# Supplementary material for: Exploring the measurement properties of the osteopathy clinical teaching questionnaire using Rasch analysis
Source: PubMed Central journal article supplement (PMC5932865; doi:10.1186/s12998-018-0182-2), 2018-05-03
Supplement: 12998_2018_182_MOESM3_ESM.pdf [file 12998_2018_182_MOESM3_ESM.pdf]

**Iteration 1**

| <b>Step</b> | <b>Description</b>               | <b>Chi-square</b> | <b>PSI</b> | <b>Items</b> | <b>Person</b> | <b>Outcome</b>                                                                                                                                                                                                                                                       |
|-------------|----------------------------------|-------------------|------------|--------------|---------------|----------------------------------------------------------------------------------------------------------------------------------------------------------------------------------------------------------------------------------------------------------------------|
| 1           | Initial analysis                 | 407.42, p<0.0001  | 0.910      | 2.34         | 2.03          | Item fit issues for 1, 3, 4, 17, 19, 24, 25, 27<br>Disordered thresholds for items 1, 9, 27, 30<br>DIF for institution (items 14, 27, 28), clinical educator gender (item 14), student gender (item 19)<br>122 misfitting persons<br>Local dependence multiple items |
| 2           | Rescore item 27                  | 316.97, p<0.0001  | 0.928      | 2.13         | 1.11          | Item fit issues for 17, 19, 24, 25, 27<br>Disordered thresholds for items 1, 30<br>DIF for institution (items 14, 27), clinical educator gender (item 14), student gender (item 19)<br>4 misfitting persons<br>Local dependence multiple items                       |
| 3           | Rescore item 30                  | 316.87, p<0.0001  | 0.928      | 2.13         | 1.11          | Item fit issues for 17, 19, 24, 25, 27<br>Disordered thresholds for items 1, 14<br>DIF for institution (items 14, 27), clinical educator gender (item 14), student gender (item 19)<br>4 misfitting persons<br>Local dependence multiple items                       |
| 4           | Delete item 27<br>(fit SD 6.497) | 237.22, p<0.0001  | 0.926      | 1.83         | 1.07          | Item fit issues for 19, 24, 25<br>Disordered thresholds for item 1<br>DIF for institution (items 14, 28), clinical educator gender (item 14), student gender (item 19)<br>3 misfitting persons<br>Local dependence multiple items                                    |
| 5           | Delete item 24<br>(fit SD 3.985) | 220.17, p<0.0001  | 0.924      | 1.83         | 1.02          | Item fit issues for 19, 25<br>Disordered thresholds for item 1<br>DIF for institution (items 14, 28), clinical educator gender (item 14)<br>3 misfitting persons<br>Local dependence multiple items                                                                  |

|    |                                  |                 |       |      |      |                                                                                                                                                                                                                                  |
|----|----------------------------------|-----------------|-------|------|------|----------------------------------------------------------------------------------------------------------------------------------------------------------------------------------------------------------------------------------|
| 6  | Delete item 25<br>(fit SD 4.904) | 186.89, p=0.002 | 0.916 | 1.74 | 1.01 | Item fit issues for 19, 26<br>Disordered thresholds for item 1<br>DIF for institution (item 14), clinical educator gender (item 14)<br>7 misfitting persons<br>Local dependence multiple items                                   |
| 7  | Delete 7 misfitting<br>persons   | 186.21, p=0.002 | 0.922 | 1.73 | 1.01 | Item fit issues for 19, 26<br>Disordered thresholds for items 1, 3<br>DIF for institution (item 14), clinical educator gender (item 14), student<br>gender (item 19)<br>No misfitting persons<br>Local dependence multiple items |
| 8  | Delete item 14<br>(due to DIF)   | 184.17, p=0.001 | 0.920 | 1.75 | 1.02 | Item fit issues for 19, 26<br>Disordered thresholds for items 1, 3<br>DIF for institution (item 28), student gender (item 19)<br>2 misfitting persons<br>Local dependence multiple items                                         |
| 9  | Delete item 19<br>(due to DIF)   | 167.77, p=0.006 | 0.915 | 1.70 | 1.00 | Item fit issues for 3, 26<br>Disordered thresholds for items 1, 3<br>No DIF<br>1 misfitting person<br>Local dependence multiple items                                                                                            |
| 10 | Delete item 3<br>(fit SD -2.566) | 170.11, p=0.001 | 0.912 | 1.59 | 0.99 | Item fit issue for 26<br>Disordered thresholds for item 1<br>DIF for institute (item 28)<br>1 misfitting person<br>Local dependence multiple items                                                                               |
| 11 | Delete item 26<br>(fit SD 2.974) | 138.57, p=0.066 | 0.903 | 1.57 | 0.97 | Item fit issues<br>Disordered thresholds for item 1<br>No DIF<br>5 misfitting persons<br>Local dependence multiple items                                                                                                         |

|    |                                                                 |                 |       |      |      |                                                                                                                                           |
|----|-----------------------------------------------------------------|-----------------|-------|------|------|-------------------------------------------------------------------------------------------------------------------------------------------|
| 12 | Delete 5 misfitting persons                                     | 137.08, p=0.078 | 0.907 | 1.56 | 0.95 | No item fit issues<br>Disordered thresholds for item 1<br>No DIF<br>No misfitting persons<br>Local dependence multiple items              |
| 13 | Delete item 1<br>(unable to resolve disordering)                | 139.43, p=0.030 | 0.904 | 1.50 | 0.95 | No item fit issues<br>No disordered thresholds<br>No DIF<br>2 misfitting persons<br>Local dependence multiple items                       |
| 14 | Delete 2 misfitting persons                                     | 135.76, p=0.048 | 0.904 | 1.52 | 0.93 | No item fit issues<br>No disordered thresholds<br>DIF for institute (item 28)<br>No misfitting persons<br>Local dependence multiple items |
| 15 | Delete item 28<br>(due to DIF)                                  | 133.23, p=0.030 | 0.904 | 1.58 | 0.92 | No item fit issues<br>No disordered thresholds<br>No DIF<br>4 misfitting persons<br>Local dependence multiple items                       |
| 16 | Delete 4 misfitting persons                                     | 129.61, p=0.051 | 0.901 | 1.55 | 0.90 | No item fit issues<br>No disordered thresholds<br>No DIF<br>No misfitting persons<br>Local dependence multiple items                      |
| 17 | Delete item 17<br>(after subtest of items 17/18 due to r=0.550) | 124.98, p=0.046 | 0.894 | 1.50 | 0.81 | Item fit issues for 4, 9<br>No disordered thresholds<br>No DIF<br>No misfitting persons<br>Local dependence multiple items                |
| 18 | Delete item 21<br>(after subtest of                             | 134.01, p=0.005 | 0.888 | 1.62 | 0.85 | Item fit issues for 4, 9<br>No disordered thresholds                                                                                      |

|    |                                                                              |                 |       |      |      |                                                                                                                           |
|----|------------------------------------------------------------------------------|-----------------|-------|------|------|---------------------------------------------------------------------------------------------------------------------------|
|    | items 21/22 due to<br>r=0.540)                                               |                 |       |      |      | No DIF<br>2 misfitting persons<br>Local dependence multiple items                                                         |
| 19 | Delete 2 misfitting<br>persons                                               | 134.01, p=0.005 | 0.890 | 1.62 | 0.85 | Item fit issues for 4, 9<br>No disordered thresholds<br>No DIF<br>2 misfitting persons<br>Local dependence multiple items |
| 20 | Delete item 9<br>(fit SD -2.718)                                             | 111.62, p=0.061 | 0.881 | 1.49 | 0.84 | Item fit issues for 4<br>No disordered thresholds<br>No DIF<br>1 misfitting person<br>Local dependence multiple items     |
| 21 | Delete misfitting<br>person                                                  | 111.62, p=0.061 | 0.882 | 1.49 | 0.84 | Item fit issues for 4<br>No disordered thresholds<br>No DIF<br>No misfitting persons<br>Local dependence multiple items   |
| 22 | Delete item 4<br>(fit SD -2.697)                                             | 102.94, p=0.090 | 0.874 | 1.35 | 0.84 | No item fit issues<br>No disordered thresholds<br>No DIF<br>No misfitting persons<br>Local dependence multiple items      |
| 23 | Delete item 6 (after<br>subtest of items<br>6/7 r=0.325, and<br>2/6 r=0.276) | 97.44, p=0.089  | 0.868 | 1.35 | 0.83 | No item fit issues<br>No disordered thresholds<br>No DIF<br>2 misfitting persons<br>Local dependence multiple items       |
| 24 | Delete 2 misfitting<br>persons                                               | 97.19, p=0.092  | 0.868 | 1.34 | 0.82 | No item fit issues<br>No disordered thresholds<br>No DIF<br>No misfitting persons                                         |

|    |                                                                |                 |       |      |      |                                                                                                                                             |
|----|----------------------------------------------------------------|-----------------|-------|------|------|---------------------------------------------------------------------------------------------------------------------------------------------|
|    |                                                                |                 |       |      |      | Local dependence multiple items                                                                                                             |
| 25 | Delete item 22<br>(after subtest of<br>items 22/23<br>r=0.410) | 88.535, p=0.135 | 0.854 | 1.50 | 0.85 | No item fit issues<br>No disordered thresholds<br>No DIF<br>7 misfitting persons<br>Local dependence multiple items                         |
| 26 | Delete 7 misfitting<br>persons                                 | 86.89, p=0.163  | 0.843 | 1.44 | 0.80 | No item fit issues<br>No disordered thresholds<br>DIF for institution (item 13)<br>No misfitting persons<br>Local dependence multiple items |
| 27 | Delete item 13<br>(due to DIF)                                 | 91.17, p=0.045  | 0.830 | 1.29 | 0.83 | No item fit issues<br>No disordered thresholds<br>No DIF<br>1 misfitting persons<br>Local dependence multiple items                         |
| 28 | Delete item 12<br>(after subtest of<br>items 11/12<br>r=0.220) | 66.47, p=0.425  | 0.809 | 1.20 | 0.82 | No item fit issues<br>No disordered thresholds<br>No DIF<br>1 misfitting persons<br>Local dependence multiple items                         |
| 29 | Delete item 29<br>(after subtest of<br>items 29/30<br>r=0.338) | 66.06, p=0.275  | 0.800 | 1.20 | 0.83 | No item fit issues<br>No disordered thresholds<br>No DIF<br>3 misfitting persons<br>No local dependence                                     |
| 30 | Delete 3 misfitting<br>persons                                 | 66.06, p=0.275  | 0.802 | 1.20 | 0.83 | p-value range 0.061<br>Lower CI 0.031-0.038<br>Upper CI 0.091-0.101                                                                         |

## Iteration 2

| Step | Description                                      | Chi-square           | PSI   | Items | Person | Outcome                                                                                                                                                                                                                                                              |
|------|--------------------------------------------------|----------------------|-------|-------|--------|----------------------------------------------------------------------------------------------------------------------------------------------------------------------------------------------------------------------------------------------------------------------|
| 1    | Initial analysis                                 | 407.42, $p < 0.0001$ | 0.910 | 2.34  | 2.03   | Item fit issues for 1, 3, 4, 17, 19, 24, 25, 27<br>Disordered thresholds for items 1, 9, 27, 30<br>DIF for institution (items 14, 27, 28), clinical educator gender (item 14), student gender (item 19)<br>122 misfitting persons<br>Local dependence multiple items |
| 2    | Delete item 27<br>(fit SD 6.138)                 | 237.36, $p < 0.0001$ | 0.926 | 1.83  | 1.07   | Item fit issues for 19, 24, 25<br>Disordered thresholds for items 1, 30<br>DIF for institution (items 14, 28), clinical educator gender (item 14), student gender (item 19)<br>3 misfitting persons<br>Local dependence multiple items                               |
| 3    | Delete item 19<br>(due to DIF and fit SD -3.229) | 236.59, $p < 0.0001$ | 0.922 | 1.74  | 1.05   | Item fit issues for 24, 25<br>Disordered thresholds for items 1, 14, 30<br>DIF for institution (items 14, 28), clinical educator gender (item 14)<br>3 misfitting persons<br>Local dependence multiple items                                                         |
| 4    | Delete 3 misfitting persons                      | 239.02, $p < 0.0001$ | 0.921 | 1.68  | 1.03   | Item fit issues for 24, 25<br>Disordered thresholds for items 1, 21, 30<br>DIF for institution (items 14, 28), clinical educator gender (item 14)<br>No misfitting persons<br>Local dependence multiple items                                                        |
| 5    | Rescore item 21                                  | 239.02, $p < 0.0001$ | 0.921 | 1.68  | 1.03   | Item fit issues for 24, 25<br>Disordered thresholds for items 1, 30<br>DIF for institution (items 14, 28), clinical educator gender (item 14)<br>No misfitting persons<br>Local dependence multiple items                                                            |
| 6    | Rescore item 30                                  | 239.02, $p < 0.0001$ | 0.921 | 1.68  | 1.03   | Item fit issues for 24, 25                                                                                                                                                                                                                                           |

|    |                                                  |                  |       |      |      |                                                                                                                                                                                            |
|----|--------------------------------------------------|------------------|-------|------|------|--------------------------------------------------------------------------------------------------------------------------------------------------------------------------------------------|
|    |                                                  |                  |       |      |      | Disordered thresholds for item 1<br>DIF for institution (items 14, 26), clinical educator gender (item 14)<br>No misfitting persons<br>Local dependence multiple items                     |
| 7  | Delete item 1<br>(unable to resolve disordering) | 218.47, p<0.0001 | 0.919 | 1.63 | 1.03 | Item fit issues for 24, 25<br>No disordered thresholds<br>DIF for institution (items 14, 28), clinical educator gender (item 14)<br>1 misfitting person<br>Local dependence multiple items |
| 8  | Delete item 24<br>(fit SD 3.720)                 | 204.69, p<0.0001 | 0.916 | 1.62 | 0.98 | Item fit issue for 25<br>No disordered thresholds<br>DIF for institution (items 14), clinical educator gender (item 14)<br>No misfitting persons<br>Local dependence multiple items        |
| 9  | Delete item 25<br>(fit SD 4.164)                 | 155.73, p=0.032  | 0.908 | 1.56 | 0.98 | Item fit issue for 26<br>No disordered thresholds<br>DIF for institution (items 14), clinical educator gender (item 14)<br>5 misfitting persons<br>Local dependence multiple items         |
| 10 | Delete 5 misfitting persons                      | 155.73, p=0.032  | 0.913 | 1.56 | 0.98 | Item fit issue for 26<br>No disordered thresholds<br>DIF for institution (items 14), clinical educator gender (item 14)<br>No misfitting persons<br>Local dependence multiple items        |
| 11 | Delete item 26                                   | 148.91, p=0.037  | 0.905 | 1.53 | 0.95 | No item fit issues<br>No disordered thresholds<br>DIF for institution (items 14), clinical educator gender (item 14)<br>6 misfitting persons<br>Local dependence multiple items            |
| 12 | Delete 6 misfitting persons                      | 139.61, p=0.106  | 0.909 | 1.54 | 0.93 | No item fit issues<br>No disordered thresholds<br>DIF for institution (items 14), clinical educator gender (item 14)                                                                       |

|    |                                                                       |                 |       |      |      |                                                                                                                                               |
|----|-----------------------------------------------------------------------|-----------------|-------|------|------|-----------------------------------------------------------------------------------------------------------------------------------------------|
|    |                                                                       |                 |       |      |      | No misfitting persons<br>Local dependence multiple items                                                                                      |
| 13 | Delete item 14                                                        | 133.91, p=0.109 | 0.906 | 1.56 | 0.93 | No item fit issues<br>No disordered thresholds<br>No DIF<br>No misfitting persons<br>Local dependence multiple items                          |
| 14 | Delete item 17<br>(after subtest<br>17/18, r=0.567)                   | 129.22, p=0.101 | 0.900 | 1.55 | 0.91 | Item fit issue for 4<br>No disordered thresholds<br>DIF for institution (item 13)<br>No misfitting persons<br>Local dependence multiple items |
| 15 | Delete item 3<br>(after subtest 2/3,<br>r=0.487)                      | 117.81, p=0.185 | 0.896 | 1.42 | 0.91 | No item fit issues<br>No disordered thresholds<br>DIF for institution (item 13)<br>No misfitting persons<br>Local dependence multiple items   |
| 16 | Delete item 13                                                        | 106.72, p=0.304 | 0.890 | 1.31 | 0.91 | No item fit issues<br>No disordered thresholds<br>No DIF<br>No misfitting persons<br>Local dependence multiple items                          |
| 17 | Delete item 6<br>(after subtest 2/6<br>r=0.325 & 4/6<br>r=0.343)      | 103.15, p=0.266 | 0.886 | 1.23 | 0.90 | No item fit issues<br>No disordered thresholds<br>No DIF<br>No misfitting persons<br>Local dependence multiple items                          |
| 18 | Delete item 11<br>(after subtest<br>10/11 r=0.202 &<br>11/12 r=0.251) | 97.61, p=0.273  | 0.880 | 1.14 | 0.90 | No item fit issues<br>No disordered thresholds<br>DIF for institution (item 28)<br>No misfitting persons<br>Local dependence multiple items   |

|    |                                                       |                  |       |      |      |                                                                                                                                             |
|----|-------------------------------------------------------|------------------|-------|------|------|---------------------------------------------------------------------------------------------------------------------------------------------|
| 19 | Delete item 29<br>(after subtest<br>29/30 $r=0.374$ ) | 87.78, $p=0.396$ | 0.876 | 1.14 | 0.88 | No item fit issues<br>No disordered thresholds<br>DIF for institution (item 28)<br>2 misfitting persons<br>Local dependence multiple items  |
| 20 | Delete 2 persons                                      | 87.78, $p=0.396$ | 0.878 | 1.14 | 0.88 | No item fit issues<br>No disordered thresholds<br>DIF for institution (item 28)<br>No misfitting persons<br>Local dependence multiple items |
| 21 | Delete item 28                                        | 88.62, $p=0.238$ | 0.873 | 1.15 | 0.87 | No item fit issues<br>No disordered thresholds<br>No DIF<br>2 misfitting persons<br>Local dependence multiple items                         |
| 22 | Delete 2 persons                                      | 88.62, $p=0.238$ | 0.874 | 1.15 | 0.87 | No item fit issues<br>No disordered thresholds<br>No DIF<br>No misfitting persons<br>Local dependence multiple items                        |
| 23 | Delete item 21<br>(after subtest<br>21/22 $r=0.511$ ) | 96.36, $p=0.04$  | 0.864 | 1.33 | 0.84 | No item fit issues<br>No disordered thresholds<br>No DIF<br>2 misfitting persons<br>Local dependence multiple items                         |
| 24 | Delete 2 persons                                      | 96.36, $p=0.04$  | 0.866 | 1.33 | 0.84 | No item fit issues<br>No disordered thresholds<br>No DIF<br>No misfitting persons<br>Local dependence multiple items                        |
| 25 | Delete item 8<br>(after subtest 8/9)                  | 73.60, $p=0.360$ | 0.859 | 1.17 | 0.85 | No item fit issues<br>No disordered thresholds                                                                                              |

|    |                                                    |                |       |      |      |                                                                                                                     |
|----|----------------------------------------------------|----------------|-------|------|------|---------------------------------------------------------------------------------------------------------------------|
|    | r=0.202)                                           |                |       |      |      | No DIF<br>1 misfitting person<br>Local dependence multiple items                                                    |
| 26 | Delete item 4<br>(after subtest 2/4<br>r=0.207)    | 62.40, p=0.568 | 0.846 | 1.05 | 0.85 | No item fit issues<br>No disordered thresholds<br>No DIF<br>3 misfitting persons<br>Local dependence items 22 & 23  |
| 27 | Delete 3 persons                                   | 62.63, p=0.560 | 0.844 | 1.05 | 0.84 | No item fit issues<br>No disordered thresholds<br>No DIF<br>No misfitting persons<br>Local dependence items 22 & 23 |
| 28 | Delete item 22<br>(after subtest<br>22/23 r=0.379) | 70.78, p=0.160 | 0.826 | 1.24 | 0.85 | No item fit issues<br>No disordered thresholds<br>No DIF<br>8 misfitting persons<br>No local dependence             |
| 29 | Delete 8 persons                                   | 65.26, p=0.298 | 0.827 | 1.18 | 0.82 | p-value range 0.02<br>Lower CI 0.002-0.008<br>Upper CI 0.037-0.049                                                  |
