# Supplementary material for: Exploring the measurement properties of the osteopathy clinical teaching questionnaire using Rasch analysis
Source: PubMed Central journal article supplement (PMC5932865; doi:10.1186/s12998-018-0182-2), 2018-05-03
Supplement: 12998_2018_182_MOESM4_ESM.pdf [file 12998_2018_182_MOESM4_ESM.pdf]

| Item                                                                                                              | Factor* | Description                                                   |
|-------------------------------------------------------------------------------------------------------------------|---------|---------------------------------------------------------------|
| 1. Treated me with respect                                                                                        | LE      | Disordered thresholds unable to be resolved through rescoring |
| 2. Maintained a positive attitude towards me                                                                      | LE      | Retained                                                      |
| 3. Fostered an environment of respect in which I felt comfortable participating                                   | LE      | Removed due to local dependence with item 2                   |
| 4. Established a good learning environment (approachable, focused, nonthreatening, professional and enthusiastic) | LE      | Removed due to local dependence with item 2                   |
| 5. Demonstrated humanistic attitudes in relating to patients (integrity, compassion and respect)                  | LE      | Retained                                                      |
| 6. Was approachable for discussion                                                                                | LE      | Removed due to local dependence with item 2                   |
| 7. Showed genuine concern for my professional well-being                                                          | LE      | Retained                                                      |
| 8. Had reasonable expectations of students                                                                        | LE      | Removed due to local dependence with item 9                   |
| 9. Has good communication skills                                                                                  | LE      | Retained                                                      |

|                                                                                          |    |                                                                 |
|------------------------------------------------------------------------------------------|----|-----------------------------------------------------------------|
| 10. Is open to student questions and alternative approaches to patient management        | LE | Retained                                                        |
| 11. Gave me the opportunity to offer opinions on patient problems or treatment           | LE | Removed due to local dependence with items 10 and 12            |
| 12. Adjusted teaching to my needs (experience, competence, interest)                     | LE | Retained                                                        |
| 13. Is an effective clinical teacher                                                     | LE | Demonstrated DIF for university                                 |
| 14. Encouraged me to think                                                               | RP | Demonstrated DIF for both university & clinical educator gender |
| 15. Promoted reflection on clinical practice                                             | RP | Retained                                                        |
| 16. Emphasises a problem-solving approach rather than solutions                          | RP | Retained                                                        |
| 17. Asked questions that promote learning (clarifies, probes, reflective questions etc.) | RP | Removed due to local dependence with item 18                    |
| 18. Asked questions to enhance my learning                                               | RP | Retained                                                        |
| 19. Encouraged questions and active participation                                        | RP | Fit residual SD = -3.229                                        |

|                                                                                                     |    |                                                     |
|-----------------------------------------------------------------------------------------------------|----|-----------------------------------------------------|
| 20. Stimulates me to learn independently                                                            | RP | Retained                                            |
| 21. Gave timely feedback to me                                                                      | FB | Removed due to local dependence with item 22        |
| 22. Gave me regular, useful feedback about my knowledge and performance                             | FB | Removed due to local dependence with item 23        |
| 23. Offered me suggestions for improvement when required                                            | FB | Retained                                            |
| 24. Identified areas needing improvement                                                            | FB | Fit residual SD = 3.720, $\chi^2=36.96$ , $p<0.001$ |
| 25. Identified my strengths                                                                         | FB | Fit residual SD = 4.164, $\chi^2=36.56$ , $p<0.001$ |
| 26. Explained to me why I was correct or incorrect                                                  | FB | Fit residual SD = 3.179                             |
| 27. Promoted keeping of medical records in a way that is thorough, legible, efficient and organised | PM | Fit residual SD = 6.938, $\chi^2=85.27$ , $p<0.001$ |
| 28. Encouraged me to assume responsibility for patient care                                         | PM | Demonstrated DIF for university                     |
| 29. Demonstrates knowledge of current medical and manual therapy literature                         | MD | Removed due to local dependence with item 30        |

|                                                                                              |    |                       |
|----------------------------------------------------------------------------------------------|----|-----------------------|
| 30. Demonstrated osteopathic, clinical examination and rehabilitation knowledge and skill(s) | MD | Retained but rescored |
|----------------------------------------------------------------------------------------------|----|-----------------------|

\*Factors identified in the paper by Vaughan (2015): LE – learning environment; RP – reflective practice; FB – feedback; PM – patient management; MD – modelling.
