# Supplementary material for: Exploring the measurement properties of the osteopathy clinical teaching questionnaire using Rasch analysis
Source: PubMed Central journal article supplement (PMC5932865; doi:10.1186/s12998-018-0182-2), 2018-05-03
Supplement: 12998_2018_182_MOESM5_ESM.pdf [file 12998_2018_182_MOESM5_ESM.pdf]

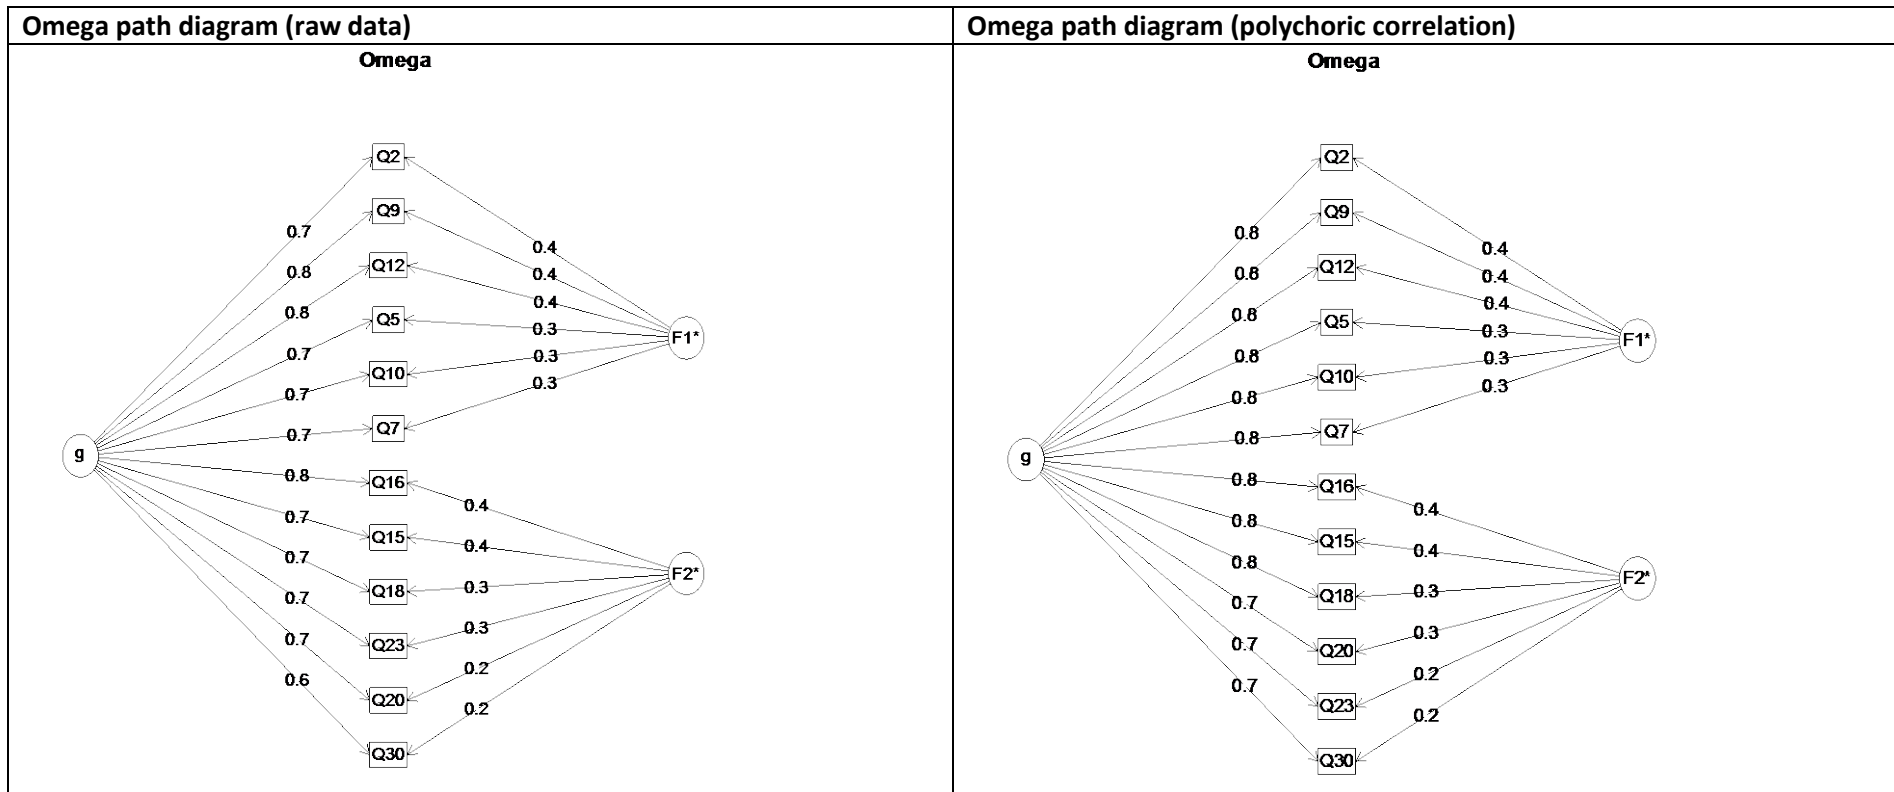

- 2. Maintained a positive attitude towards me
- 5. Demonstrated humanistic attitudes in relating to patients (integrity, compassion and respect)
- 7. Showed genuine concern for my professional well-being
- 9. Has good communication skills
- 10. Is open to student questions and alternative approaches to patient management
- 12. Adjusted teaching to my needs (experience, competence, interest)
- 15. Promoted reflection on clinical practice
- 16. Emphasises a problem-solving approach rather than solutions
- 18. Asked questions to enhance my learning
- 20. Stimulates me to learn independently
- 23. Offered me suggestions for improvement when required
- 30. Demonstrated osteopathic, clinical examination and rehabilitation knowledge and skill(s)
