# Supplementary material for: Exploring the measurement properties of the osteopathy clinical teaching questionnaire using Rasch analysis
Source: PubMed Central journal article supplement (PMC5932865; doi:10.1186/s12998-018-0182-2), 2018-05-03
Supplement: 12998_2018_182_MOESM6_ESM.pdf [file 12998_2018_182_MOESM6_ESM.pdf]

## Scoring structure for the 12-item Osteopathy Clinical Teaching Questionnaire.

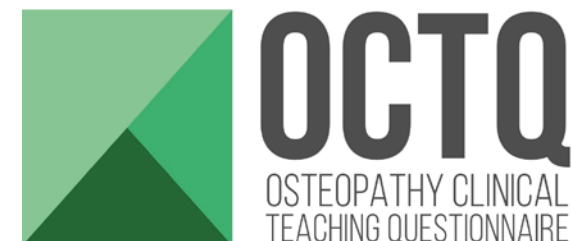

| Item                                                                                             | Strongly disagree | Disagree | Neither agree nor disagree | Agree | Strongly agree |
|--------------------------------------------------------------------------------------------------|-------------------|----------|----------------------------|-------|----------------|
| 1. Maintained a positive attitude towards me                                                     | 1                 | 2        | 3                          | 4     | 5              |
| 2. Demonstrated humanistic attitudes in relating to patients (integrity, compassion and respect) | 1                 | 2        | 3                          | 4     | 5              |
| 3. Showed genuine concern for my professional well-being                                         | 1                 | 2        | 3                          | 4     | 5              |
| 4. Has good communication skills                                                                 | 1                 | 2        | 3                          | 4     | 5              |
| 5. Is open to student questions and alternative approaches to patient management                 | 1                 | 2        | 3                          | 4     | 5              |
| 6. Adjusted teaching to my needs (experience, competence, interest)                              | 1                 | 2        | 3                          | 4     | 5              |
| 7. Promoted reflection on clinical practice                                                      | 1                 | 2        | 3                          | 4     | 5              |
| 8. Emphasises a problem-solving approach rather than solutions                                   | 1                 | 2        | 3                          | 4     | 5              |
| 9. Asked questions to enhance my learning                                                        | 1                 | 2        | 3                          | 4     | 5              |
| 10. Stimulates me to learn independently                                                         | 1                 | 2        | 3                          | 4     | 5              |
| 11. Offered me suggestions for improvement when required                                         | 1                 | 2        | 3                          | 4     | 5              |
| 12. Demonstrated osteopathic, clinical examination and rehabilitation knowledge and skill(s)     | 1                 | 1        | 2                          | 3     | 4              |

Raw score to Rasch score conversion  
for the 12-item Osteopathy Clinical  
Teaching Questionnaire.

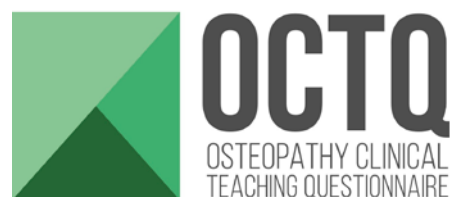

| Total score | Rasch score | Strata |
|-------------|-------------|--------|
| 12          | 0           | 1      |
| 13          | 1           | 1      |
| 14          | 1           | 1      |
| 15          | 2           | 1      |
| 16          | 3           | 1      |
| 17          | 4           | 1      |
| 18          | 6           | 1      |
| 19          | 8           | 2      |
| 20          | 10          | 2      |
| 21          | 13          | 2      |
| 22          | 15          | 2      |
| 23          | 18          | 2      |
| 24          | 21          | 2      |
| 25          | 24          | 3      |
| 26          | 27          | 3      |
| 27          | 30          | 3      |
| 28          | 33          | 3      |
| 29          | 36          | 3      |
| 30          | 39          | 3      |
| 31          | 42          | 3      |
| 32          | 45          | 3      |
| 33          | 48          | 4      |

| Total score | Rasch score | Strata |
|-------------|-------------|--------|
| 34          | 51          | 4      |
| 35          | 53          | 4      |
| 36          | 56          | 4      |
| 37          | 59          | 4      |
| 38          | 61          | 4      |
| 39          | 64          | 4      |
| 40          | 67          | 4      |
| 41          | 69          | 4      |
| 42          | 72          | 4      |
| 43          | 74          | 4      |
| 44          | 76          | 4      |
| 45          | 78          | 4      |
| 46          | 80          | 4      |
| 47          | 82          | 4      |
| 48          | 84          | 4      |
| 49          | 86          | 4      |
| 50          | 88          | 4      |
| 51          | 90          | 4      |
| 52          | 91          | 4      |
| 53          | 93          | 4      |
| 54          | 94          | 4      |
| 55          | 96          | 4      |

| Total score | Rasch score | Strata |
|-------------|-------------|--------|
| 56          | 97          | 4      |
| 57          | 98          | 4      |
| 58          | 99          | 4      |
| 59          | 100         | 4      |
