# Supplementary material for: Exploring the measurement properties of the osteopathy clinical teaching questionnaire using Rasch analysis
Source: Springer Nature journal article supplement (doi:10.1186/s12998-018-0182-2), 2018-04-04
Supplement: MOESM2 [file 15737012]

| Item | 1      | 2      | 3      | 4      | 5      | 6      | 7      | 8      | 9      | 10     | 11     | 12     | 13     | 14     | 15     | 16     | 17     | 18     | 19     | 20     | 21     | 22     | 23     | 24     | 25     | 26     | 27     | 28     | 29    | 30 |
|------|--------|--------|--------|--------|--------|--------|--------|--------|--------|--------|--------|--------|--------|--------|--------|--------|--------|--------|--------|--------|--------|--------|--------|--------|--------|--------|--------|--------|-------|----|
| 1    | 1      |        |        |        |        |        |        |        |        |        |        |        |        |        |        |        |        |        |        |        |        |        |        |        |        |        |        |        |       |    |
| 2    | 0.647  | 1      |        |        |        |        |        |        |        |        |        |        |        |        |        |        |        |        |        |        |        |        |        |        |        |        |        |        |       |    |
| 3    | 0.538  | 0.542  | 1      |        |        |        |        |        |        |        |        |        |        |        |        |        |        |        |        |        |        |        |        |        |        |        |        |        |       |    |
| 4    | 0.185  | 0.262  | 0.390  | 1      |        |        |        |        |        |        |        |        |        |        |        |        |        |        |        |        |        |        |        |        |        |        |        |        |       |    |
| 5    | 0.081  | 0.123  | 0.108  | 0.175  | 1      |        |        |        |        |        |        |        |        |        |        |        |        |        |        |        |        |        |        |        |        |        |        |        |       |    |
| 6    | 0.272  | 0.351  | 0.348  | 0.390  | 0.036  | 1      |        |        |        |        |        |        |        |        |        |        |        |        |        |        |        |        |        |        |        |        |        |        |       |    |
| 7    | 0.108  | 0.131  | 0.116  | 0.119  | 0.174  | 0.333  | 1      |        |        |        |        |        |        |        |        |        |        |        |        |        |        |        |        |        |        |        |        |        |       |    |
| 8    | 0.133  | 0.185  | 0.153  | 0.223  | 0.068  | 0.110  | 0.169  | 1      |        |        |        |        |        |        |        |        |        |        |        |        |        |        |        |        |        |        |        |        |       |    |
| 9    | 0.185  | 0.108  | 0.251  | 0.218  | 0.181  | 0.092  | 0.021  | 0.257  | 1      |        |        |        |        |        |        |        |        |        |        |        |        |        |        |        |        |        |        |        |       |    |
| 10   | 0.110  | 0.104  | 0.124  | 0.171  | 0.151  | 0.084  | -0.067 | 0.148  | 0.218  | 1      |        |        |        |        |        |        |        |        |        |        |        |        |        |        |        |        |        |        |       |    |
| 11   | 0.074  | 0.104  | 0.081  | 0.061  | 0.044  | 0.062  | -0.037 | 0.162  | 0.075  | 0.264  | 1      |        |        |        |        |        |        |        |        |        |        |        |        |        |        |        |        |        |       |    |
| 12   | 0.127  | 0.108  | 0.056  | 0.066  | -0.043 | 0.015  | -0.051 | 0.105  | 0.164  | 0.153  | 0.302  | 1      |        |        |        |        |        |        |        |        |        |        |        |        |        |        |        |        |       |    |
| 13   | 0.054  | 0.013  | 0.091  | 0.133  | 0.012  | 0.026  | -0.112 | -0.076 | 0.201  | 0.111  | 0.076  | 0.228  | 1      |        |        |        |        |        |        |        |        |        |        |        |        |        |        |        |       |    |
| 14   | -0.178 | -0.192 | -0.196 | -0.14  | -0.128 | -0.136 | -0.161 | -0.195 | -0.121 | -0.131 | -0.085 | -0.088 | 0.202  | 1      |        |        |        |        |        |        |        |        |        |        |        |        |        |        |       |    |
| 15   | -0.225 | -0.174 | -0.198 | -0.099 | -0.081 | -0.052 | 0.080  | -0.071 | -0.171 | -0.105 | -0.111 | -0.042 | -0.030 | 0.224  | 1      |        |        |        |        |        |        |        |        |        |        |        |        |        |       |    |
| 16   | -0.171 | -0.203 | -0.186 | -0.101 | -0.099 | -0.206 | -0.051 | -0.080 | -0.034 | -0.007 | 0.013  | -0.064 | 0.079  | 0.295  | 0.277  | 1      |        |        |        |        |        |        |        |        |        |        |        |        |       |    |
| 17   | -0.131 | -0.188 | -0.199 | -0.164 | -0.094 | -0.126 | -0.124 | -0.142 | -0.113 | -0.077 | 0.056  | 0.067  | 0.096  | 0.314  | 0.159  | 0.202  | 1      |        |        |        |        |        |        |        |        |        |        |        |       |    |
| 18   | -0.168 | -0.168 | -0.184 | -0.134 | -0.084 | -0.172 | -0.149 | -0.19  | -0.146 | -0.084 | -0.057 | -0.079 | 0.082  | 0.332  | 0.092  | 0.206  | 0.558  | 1      |        |        |        |        |        |        |        |        |        |        |       |    |
| 19   | -0.074 | -0.061 | -0.108 | -0.007 | -0.042 | -0.042 | -0.001 | -0.126 | -0.116 | -0.060 | -0.036 | -0.056 | 0.039  | 0.118  | 0.031  | 0.045  | 0.214  | 0.376  | 1      |        |        |        |        |        |        |        |        |        |       |    |
| 20   | -0.166 | -0.069 | -0.134 | -0.087 | 0.059  | -0.136 | 0.080  | -0.114 | -0.09  | -0.157 | -0.081 | -0.044 | -0.092 | 0.006  | -0.006 | 0.042  | -0.103 | 0.049  | 0.063  | 1      |        |        |        |        |        |        |        |        |       |    |
| 21   | -0.091 | -0.097 | -0.082 | -0.206 | -0.141 | -0.134 | -0.066 | -0.132 | -0.113 | -0.203 | -0.139 | -0.165 | -0.241 | -0.205 | -0.011 | -0.041 | -0.120 | -0.141 | -0.053 | 0.013  | 1      |        |        |        |        |        |        |        |       |    |
| 22   | -0.095 | -0.186 | -0.219 | -0.235 | -0.248 | -0.098 | -0.132 | -0.151 | -0.093 | -0.182 | -0.156 | -0.166 | -0.227 | -0.150 | -0.027 | -0.099 | -0.112 | -0.116 | -0.004 | -0.020 | 0.541  | 1      |        |        |        |        |        |        |       |    |
| 23   | -0.086 | -0.139 | -0.158 | -0.188 | -0.169 | -0.184 | -0.124 | -0.144 | -0.112 | -0.197 | -0.178 | -0.12  | -0.220 | -0.066 | -0.042 | -0.062 | -0.095 | -0.097 | -0.166 | 0.007  | 0.178  | 0.408  | 1      |        |        |        |        |        |       |    |
| 24   | -0.296 | -0.349 | -0.297 | -0.306 | -0.208 | -0.257 | -0.157 | -0.261 | -0.254 | -0.276 | -0.299 | -0.332 | -0.216 | 0.035  | -0.061 | -0.053 | -0.050 | 0.001  | -0.124 | -0.004 | 0.151  | 0.219  | 0.279  | 1      |        |        |        |        |       |    |
| 25   | -0.018 | -0.085 | -0.091 | -0.147 | -0.144 | -0.095 | -0.124 | -0.056 | -0.23  | -0.109 | -0.216 | -0.122 | -0.133 | -0.219 | -0.180 | -0.250 | -0.224 | -0.216 | -0.137 | -0.081 | 0.082  | 0.112  | 0.125  | 0.331  | 1      |        |        |        |       |    |
| 26   | -0.141 | -0.154 | -0.102 | -0.100 | -0.148 | -0.074 | -0.153 | -0.115 | -0.141 | -0.133 | -0.163 | -0.066 | -0.076 | -0.137 | -0.141 | -0.193 | -0.110 | -0.034 | -0.053 | -0.108 | 0.056  | 0.037  | 0.180  | 0.240  | 0.213  | 1      |        |        |       |    |
| 27   | -0.260 | -0.255 | -0.261 | -0.233 | -0.093 | -0.184 | -0.082 | -0.091 | -0.203 | -0.198 | -0.090 | -0.096 | -0.233 | 0.040  | -0.043 | -0.059 | -0.082 | -0.109 | -0.163 | 0.031  | 0.017  | 0.055  | -0.029 | 0.155  | 0.070  | 0.042  | 1      |        |       |    |
| 28   | -0.205 | -0.169 | -0.173 | -0.247 | 0.049  | -0.142 | -0.016 | -0.163 | -0.175 | -0.155 | -0.114 | -0.118 | -0.155 | 0.123  | -0.025 | 0.061  | -0.086 | -0.072 | -0.088 | 0.070  | 0.093  | -0.048 | 0.030  | 0.064  | -0.052 | 0.044  | 0.255  | 1      |       |    |
| 29   | -0.177 | -0.109 | -0.128 | -0.059 | 0.039  | -0.156 | -0.130 | -0.125 | -0.041 | 0.017  | -0.053 | -0.169 | 0.000  | -0.104 | -0.020 | 0.012  | 0.073  | 0.018  | -0.006 | -0.048 | -0.138 | -0.143 | -0.099 | 0.056  | -0.095 | -0.081 | -0.021 | 0.109  | 1     |    |
| 30   | -0.096 | -0.121 | -0.076 | -0.044 | 0.008  | -0.102 | -0.138 | -0.103 | -0.033 | 0.015  | 0.058  | -0.096 | 0.119  | 0.024  | -0.098 | -0.079 | 0.108  | 0.052  | 0.089  | -0.054 | -0.135 | -0.156 | -0.045 | -0.007 | -0.088 | -0.040 | -0.020 | -0.026 | 0.396 | 1  |

Note: residual correlations >0.20 are highlighted.
